# Gender Differences in Tardive Dyskinesia: A Critical Review of the Literature

by **Ramzy Yassa and Dillip V. Jeste**

## Abstract

We analyzed data from 76 selected studies on prevalence of tardive dyskinesia (TD), published through 1989. The primary focus was on gender differences. The overall prevalence of TD in the 39,187 patients included in these reports was 24.2 percent, and prevalence was significantly higher in women (26.6%) than in men (21.6%). The gender difference in TD prevalence appeared to narrow intriguingly in more recent studies. Overall, the TD prevalence seemed to reach its peak in the 50–70-year-old age group in men and continued to rise after age 70 in women. Also, women tended to have more severe TD than men. Spontaneous dyskinesia too was found to be more common in women. The material was also analyzed for cultural differences by comparing studies in four continents: North America, Europe, Africa, and Asia. Although grouping together studies from different countries in a continent into a single group is somewhat problematic, we found that Asian patients had lower prevalence of TD than North American, European, and African patients. Limitations of our review (including differences among studies in diagnostic criteria, observer bias, etc.) as well as possible explanations for the reported differences in the risk for TD are discussed.

Tardive dyskinesia (TD) is characterized by late onset of involuntary, purposeless movements in neuroleptic-treated patients (Casey and Keepers 1988). Although buccoral movements dominate the picture, other parts of the body may also be involved.

Since the syndrome was introduced into the literature more than 30 years ago, older age has been the only consistent risk factor confirmed by most

of the authors (Smith and Baldessarini 1980). Several other factors have been considered as predisposing to the development of TD, including mood disorder (Yassa et al. 1984), "organicity" (Wolf et al. 1982), type of neuroleptic prescribed (Cole et al. 1986), age at first neuroleptic treatment (Jeste et al. 1982a), amount of neuroleptic used (Casey and Keepers 1988), number of lengthy drug-free periods (Jeste et al. 1979; Yassa et al. 1986), and development of early extrapyramidal side effects (Casey and Keepers 1988), but the status of these variables as risk factors for TD is still not fully established (Lam et al. 1988).

Gender has also been advocated by some authors as an important factor in the development of TD. Some authors concluded that women had a higher prevalence of TD than men, whereas others found no gender difference in TD prevalence (Jeste and Wyatt 1981). Seeman (1983) related the increased frequency of TD among postmenopausal women to hormonal changes and suggested an interaction among gender, age, and neuroleptic effects.

The aim of our literature review was to critically examine the association between gender and TD in terms of prevalence, severity, and manifestations, with special attention to confounding variables such as age, ethnicity, spontaneous dyskinesia, and neuroleptic treatment.

## Material and Method

We reviewed all the available prevalence studies on TD published through 1989. The studies were retrieved

Reprint requests should be sent to Dr. R. Yassa, Douglas Hospital, 6875 Lasalle Blvd., Verdun, Quebec, H4H 1R3, Canada.

through a Medline search as well as through references cited in major review articles (Smith and Baldessarini 1980; Jeste and Wyatt 1981; Kane and Smith 1982; Simpson et al. 1986; Barnes 1987; Waddington 1987; Casey and Keepers 1988; Driesens 1988; Villeneuve and Lajeunesse 1988; Yassa 1988; Lajeunesse and Villeneuve 1989) and books (Baldessarini 1979; Jeste and Wyatt 1982; Shah and Donald 1986; Tanner 1986; Lohr and Wisniewski 1987). Only articles published in English and French (or in other languages, if there was a detailed summary of the study given in English or French) were reviewed.

We found a total of 94 prevalence studies published in the two languages through August 1989. To be included in this survey, a study had to do the following:

1. Report on 50 patients or more. This criterion excluded one study in which the total number of patients assessed was 39 (Crane and Smeets 1974).
2. Include both genders in its sample. This criterion excluded five studies that examined only women (Uhrbrand and Faurbye 1960; Pryce and Edwards 1966; Edwards 1970) or men (Dynes 1970; Goldberg et al. 1982).
3. Indicate the number of men and women affected by TD or at least allow the number to be computed from figures or tables. This criterion excluded 12 studies (Hunter et al. 1964; Paulson 1968; Yagi et al. 1976; Bell and Smith 1978; Alexopoulos 1979; Gardos et al. 1980; Cunningham-Owens et al. 1982; McCreadie et al. 1982; Holden et al. 1984; Lieberman et al. 1984; Kane et al. 1985; Waddington and Youssef 1986).

For the final analysis, a total of 76 prevalence studies comprising 39,187 patients were reviewed (table 1). The sample sizes ranged from 50 (Famu-

jiwa et al. 1979) to 3,319 patients (Simpson et al. 1978) with a mean of 530 patients per study.

**Study Characteristics.** The survey covered studies from many continents, including Canada, China, Eastern European countries, France, Germany, India, Italy, Japan, Morocco, Scandinavian countries, South Africa, United Kingdom, and the United States.

Forty-six of the studies were conducted in an inpatient setting of a psychiatric hospital, 12 studies took place in an outpatient setting of a psychiatric hospital, and 11 studies were conducted in a psychiatric department of a general hospital. One study was done in a private hospital, and one multicenter investigation involved various countries. In five reports, it was difficult to determine the nature of the center where the work had been done.

Most of the earlier studies used no rating scales to measure TD (Hunter et al. 1964; Demars 1966; Dincmen 1966; Crane and Paulson 1967; Degkwitz and Wenzel 1967; Siede and Muller 1967; Turunen and Achté 1967; Heinrich et al. 1968). Later studies employed a scale, mainly the Abnormal Involuntary Movement Scale (AIMS; Guy 1976), or the Rockland TD Scale (Simpson et al. 1979).

Of the total number of studies reviewed, only 20 indicated the mean ages of both men and women (Demars 1966; Jones and Hunter 1969; Lehmann et al. 1970; Kennedy et al. 1971; Jus et al. 1976; Asnis et al. 1977; Simpson et al. 1978; Smith et al. 1978; Chouinard et al. 1979, 1986; Smith et al. 1979; Perenyi and Arato 1980; Rey et al. 1981; Ananth and Yassa 1982; Mukherjee et al. 1982; Yesavage et al. 1982; Yassa et al. 1983, 1988; Rittmannsberger and Schony 1986; Holden 1987). In nine studies (Crane

1970; Lehmann et al. 1970; Ogita 1972; Famujiwa et al. 1979; Ezrin-Waters et al. 1981; Brainin et al. 1983; Branchey and Branchey 1984; Richardson et al. 1984; Kok and Christopher 1985) there were no patients older than 65 years, while in two studies (Siede and Muller 1967; Ramsay and Millard 1986) only geriatric patients were included. Although most studies dealt with patients diagnosed as suffering from schizophrenia, three studies dealt only with mentally retarded patients (Richardson et al. 1986; Youssef and Waddington 1988; Stone et al. 1989).

Wherever there was sufficient documentation, we included only those cases in which the diagnosis of TD appeared to be reliable. An odds ratio (OR) of the relative risk of TD in men to that in women along with a 95 percent confidence interval ( $CI_{95}$ ) was calculated for each study.

## Results

The prevalence of TD was estimated at 24.2 percent (range 3.3% to 62%). In men, the prevalence of TD was estimated at 21.6 percent (range 0% to 53.5%) and in women, 26.6 percent (range 3.2% to 73.8%).

Table 1 summarizes the results of individual studies in terms of proportion of men to women (M:W) with TD as well as the ORs. Combining results from all studies, the mean OR was found to be 1.34 ( $CI_{95}$  = 1.3-1.4). Eighteen of the 76 studies found significantly higher W:M relative risk for TD ( $p < 0.05$ ; lower boundary of 95%  $CI > 1.0$ ). Only two studies (Perenyi and Arato 1980; Moussaoui et al. 1988) found significantly higher M:W relative risk ( $p < 0.05$ ; upper boundary of 95%  $CI < 1.0$ ). Note that the ORs for two studies (Hunter et al. 1964; Fanget et al.

**Table 1. Prevalence studies and gender differences**

| Study                         | Total<br><i>n</i> | Overall<br>prevalence<br>of TD (%) | Men<br>total<br><i>n</i> | Men<br>with<br>TD (%) | Women<br>total<br><i>n</i> | Women<br>with<br>TD (%) | <i>p</i> <sup>1</sup> | Odds<br>ratio      | 95% CI             |
|-------------------------------|-------------------|------------------------------------|--------------------------|-----------------------|----------------------------|-------------------------|-----------------------|--------------------|--------------------|
| Hunter et al. (1964)          | 450               | 3.3                                | 200                      | 0                     | 250                        | 5.2                     | <0.005                | 10.92 <sup>2</sup> | 1.4-84.2           |
| Demars (1966)                 | 371               | 7.0                                | 166                      | 4.8                   | 205                        | 8.8                     | NS                    | 1.90               | 0.8-4.5            |
| Dincmen (1966)                | 1,700             | 3.4                                | 850                      | 1.6                   | 850                        | 5.2                     | <0.001                | 3.26               | 1.8-6.0            |
| Crane & Paulson<br>(1967)     | 182               | 14.8                               | 66                       | 15.2                  | 116                        | 14.7                    | NS                    | 0.96               | 0.4-2.2            |
| Degkwitz &<br>Wenzel (1967)   | 766<br>499        | 17.0<br>22.8                       | 303<br>193               | 10.9<br>20.7          | 463<br>306                 | 21.0<br>24.2            | <0.001<br>NS          | 2.17<br>1.22       | 1.4-3.3<br>0.8-1.9 |
| Siede & Muller<br>(1967)      | 404               | 11.4                               | 109                      | 7.0                   | 295                        | 13.0                    | NS                    | 1.87               | 0.8-4.1            |
| Turunen & Achte<br>(1967)     | 480               | 5.4                                | 207                      | 3.4                   | 273                        | 7.3                     | NS                    | 2.14               | 0.9-5.2            |
| Crane (1968)                  | 379               | 27.4                               | 207                      | 31.0                  | 172                        | 23.3                    | NS                    | 0.68               | 0.4-1.1            |
| Heinrich et al. (1968)        | 554               | 17.0                               | 228                      | 12.3                  | 326                        | 20.2                    | <0.025                | 1.81               | 1.1-2.9            |
| Jones & Hunter<br>(1969)      | 82                | 30.5                               | 13                       | 7.7                   | 69                         | 34.8                    | <0.05                 | 6.40               | 0.8-52.2           |
| Villeneuve et al.<br>(1969)   | 3,280             | 2.1                                | 1,929                    | 1.3                   | 1,351                      | 3.2                     | <0.001                | 2.50               | 1.5-4.1            |
| Crane (1970)                  | 127               | 26.8                               | 62                       | 27.4                  | 65                         | 26.1                    | NS                    | 0.94               | 0.4-2.1            |
| Hippius & Lange<br>(1970)     | 531               | 34.4                               | 244                      | 34.4                  | 287                        | 34.1                    | NS                    | 0.99               | 0.7-1.4            |
| Lehmann et al.<br>(1970)      | 350               | 6.6                                | 168                      | 4.2                   | 182                        | 8.8                     | NS                    | 2.22               | 0.9-5.5            |
| Brandon et al. (1971)         | 625               | 25.1                               | 264                      | 17.0                  | 361                        | 31.0                    | <0.001                | 2.19               | 1.5-3.2            |
| Kennedy et al. (1971)         | 63                | 62.0                               | 32                       | 53.0                  | 31                         | 71.0                    | NS                    | 2.16               | 0.8-6.1            |
| Fann et al. (1972)            | 193               | 34.7                               | 138                      | 31.1                  | 55                         | 43.6                    | NS                    | 1.71               | 0.9-3.3            |
| Ogita (1972)                  | 454               | 17.9                               | 70                       | 17.1                  | 53                         | 18.9                    | NS                    | 1.12               | 0.4-2.8            |
| Lehmann & Ban<br>(1974)       | 123               | 6.8                                | 199                      | 5.5                   | 255                        | 7.8                     | NS                    | 1.45               | 0.7-3.1            |
| Bourgeois et al.<br>(1976)    | 1,660             | 7.2                                | 737                      | 4.9                   | 923                        | 9.1                     | <0.001                | 1.95               | 1.3-2.9            |
| Jus et al. (1976)             | 332               | 56.0                               | 142                      | 53.5                  | 190                        | 58.0                    | NS                    | 1.19               | 0.8-1.9            |
| Asnis et al. (1977)           | 69                | 43.4                               | 16                       | 31.0                  | 53                         | 47.0                    | NS                    | 1.96               | 0.6-6.4            |
| Simpson et al. (1978)         | 3,319             | 11.0                               | 1,577                    | 7.5                   | 1,742                      | 13.8                    | <0.001                | 1.97               | 1.6-2.5            |
| Smith et al. (1978)           | 293               | 45.7                               | 150                      | 39.0                  | 143                        | 52.4                    | <0.025                | 1.70               | 1.1-2.7            |
| Chouinard et al.<br>(1979)    | 261               | 31.0                               | 138                      | 29.0                  | 123                        | 32.5                    | NS                    | 1.18               | 0.7-2.0            |
| Famuljiwa et al.<br>(1979)    | 50                | 34.0                               | 26                       | 26.9                  | 24                         | 41.7                    | NS                    | 1.94               | 0.6-6.4            |
| Jeste et al. (1979)           | 88                | 23.9                               | 27                       | 22.2                  | 61                         | 24.6                    | NS                    | 1.14               | 0.4-3.4            |
| Perris et al. (1979)          | 347               | 17.0                               | 213                      | 9.4                   | 134                        | 29.8                    | <0.001                | 4.11               | 2.3-7.4            |
| Perenyi & Arato<br>(1980)     | 200               | 23.5                               | 100                      | 31.0                  | 100                        | 16.0                    | <0.02                 | 0.42 <sup>2</sup>  | 0.2-0.8            |
| Wojcik et al. (1980)          | 208               | 18.0                               | 92                       | 16.0                  | 116                        | 19.0                    | NS                    | 1.20               | 0.6-2.5            |
| Ezrin-Waters et al.<br>(1981) | 94                | 43.6                               | 58                       | 39.6                  | 36                         | 50.0                    | NS                    | 1.52               | 0.7-3.5            |

**Table 1. Prevalence studies and gender differences—Continued**

| Study                              | Total<br><i>n</i> | Overall<br>prevalence<br>of TD (%) | Men<br>total<br><i>n</i> | Men<br>with<br>TD (%) | Women<br>total<br><i>n</i> | Women<br>with<br>TD (%) | <i>p</i> <sup>1</sup> | Odds<br>ratio     | 95% CI   |
|------------------------------------|-------------------|------------------------------------|--------------------------|-----------------------|----------------------------|-------------------------|-----------------------|-------------------|----------|
| Jeste & Wyatt (1981)               | 95                | 31.6                               | 25                       | 24.0                  | 70                         | 34.3                    | NS                    | 1.65              | 0.6–4.7  |
| Rey et al. (1981)                  | 66                | 43.9                               | 39                       | 39.0                  | 27                         | 52.0                    | NS                    | 1.72              | 0.6–4.7  |
| Ananth & Yassa<br>(1982)           | 223               | 20.6                               | 116                      | 16.3                  | 107                        | 25.2                    | NS                    | 1.72              | 0.9–3.3  |
| Doongaji et al. (1982)             | 1,801             | 9.6                                | 1,141                    | 9.5                   | 660                        | 9.8                     | NS                    | 1.04              | 0.8–1.4  |
| Kane et al. (1982 <i>b</i> )       | 328               | 15.8                               | 193                      | 13.5                  | 135                        | 19.2                    | NS                    | 1.53              | 0.8–2.8  |
| Mukherjee et al.<br>(1982)         | 153               | 30.7                               | 41                       | 34.1                  | 112                        | 29.1                    | NS                    | 0.81              | 0.4–1.7  |
| Yesavage et al.<br>(1982)          | 3,140             | 8.2                                | 1,568                    | 5.8                   | 1,572                      | 10.6                    | <0.001                | 1.93              | 1.5–2.5  |
| Brainin et al. (1983)              | 335               | 14.6                               | 132                      | 15.0                  | 203                        | 14.3                    | NS                    | 0.93              | 0.5–1.7  |
| Yassa et al. (1983)                | 180               | 27.0                               | 83                       | 22.0                  | 97                         | 32.0                    | NS                    | 1.70              | 0.9–3.3  |
| Branchey &<br>Branchey (1984)      | 57                | 24.6                               | 43                       | 25.6                  | 14                         | 21.4                    | NS                    | 0.79              | 0.2–3.4  |
| Itoh et al. (1984)                 | 2,274             | 19.0                               | 969                      | 19.6                  | 1,305                      | 18.8                    | NS                    | 0.95              | 0.8–1.2  |
| Kane et al. (1984)                 | 554               | 12.4                               | 288                      | 12.8                  | 266                        | 12.0                    | NS                    | 0.93              | 0.6–1.5  |
| Kulhanek et al.<br>(1984)          | 861               | 15.0                               | 398                      | 14.8                  | 463                        | 15.3                    | NS                    | 1.04              | 0.7–1.5  |
| Richardson et al.<br>(1984)        | 167               | 61.7                               | 87                       | 50.6                  | 80                         | 73.8                    | <0.005                | 2.75              | 1.4–5.3  |
| Yassa et al. (1984)                | 108               | 7.4                                | 55                       | 5.5                   | 53                         | 9.4                     | NS                    | 1.81              | 0.4–8.0  |
| Fleischhauer et al.<br>(1985)      | 608               | 31.6                               | 255                      | 29.8                  | 353                        | 32.9                    | NS                    | 1.15              | 0.8–1.6  |
| Guy et al. (1985)                  | 768               | 11.0                               | 430                      | 11.0                  | 338                        | 11.0                    | NS                    | 1.00              | 0.6–1.6  |
| Kok &<br>Christopher (1985)        | 211               | 9.9                                | 100                      | 7.0                   | 111                        | 12.6                    | NS                    | 1.92              | 0.7–5.0  |
| Waddington & Yous-<br>sef (1985)   | 68                | 41.0                               | 22                       | 36.4                  | 46                         | 43.4                    | NS                    | 1.35              | 0.5–3.8  |
| Chouinard et al.<br>(1986)         | 224               | 45.0                               | 113                      | 45.0                  | 111                        | 44.0                    | NS                    | 0.96              | 0.6–1.6  |
| Fanget et al. (1986)               | 52                | 4.0                                | 22                       | 0                     | 30                         | 6.7                     | NS                    | 1.50 <sup>2</sup> | 0.1–17.7 |
| Kolakowska et al.<br>(1986)        | 91                | 25.0                               | 59                       | 27.0                  | 32                         | 22.0                    | NS                    | 0.75              | 0.3–2.1  |
| Ramsay & Millard<br>(1986)         | 426               | 11.5                               | 92                       | 7.6                   | 334                        | 12.6                    | NS                    | 1.75              | 0.8–4.0  |
| Richardson et al.<br>(1986)        | 211               | 30.0                               | 139                      | 23.0                  | 72                         | 43.0                    | <0.005                | 2.53              | 1.4–4.7  |
| Rittmannsberger &<br>Schony (1986) | 76                | 25.0                               | 46                       | 19.6                  | 30                         | 33.3                    | NS                    | 2.06              | 0.7–5.9  |
| Williams & Dalby<br>(1986)         | 196               | 34.2                               | 106                      | 34.0                  | 90                         | 34.4                    | NS                    | 1.02              | 0.6–1.8  |
| Yassa et al. (1986)                | 76                | 25.0                               | 32                       | 22.0                  | 44                         | 40.9                    | NS                    | 2.47              | 0.9–6.9  |
| Binder et al. (1987)               | 126               | 35.0                               | 66                       | 41.0                  | 60                         | 28.3                    | NS                    | 0.57              | 0.3–1.2  |
| Gurge (1987)                       | 70                | 37.0                               | 54                       | 39.0                  | 16                         | 31.0                    | NS                    | 0.94              | 0.3–3.0  |
| Holden (1987)                      | 100               | 39.0                               | 50                       | 26.0                  | 50                         | 52.0                    | <0.01                 | 3.08              | 1.3–7.1  |

**Table 1. Prevalence studies and gender differences—Continued**

| Study                                   | Total<br><i>n</i> | Overall<br>prevalence<br>of TD (%) | Men<br>total<br><i>n</i> | Men<br>with<br>TD (%) | Women<br>total<br><i>n</i> | Women<br>with<br>TD (%) | <i>p</i> <sup>1</sup> | Odds<br>ratio     | 95% CI   |
|-----------------------------------------|-------------------|------------------------------------|--------------------------|-----------------------|----------------------------|-------------------------|-----------------------|-------------------|----------|
| Morgenstern et al.<br>(1987)            | 180               | 33.0                               | 89                       | 37.0                  | 91                         | 30.0                    | NS                    | 0.72              | 0.4–1.3  |
| Ahrens et al. (1988)                    | 385               | 19.7                               | 256                      | 17.0                  | 129                        | 26.0                    | <0.05                 | 1.66              | 1.0–2.8  |
| Delance (1988)                          | 262               | 39.0                               | 126                      | 37.3                  | 136                        | 40.7                    | NS                    | 1.14              | 0.7–1.9  |
| Moussaoui et al.<br>(1988) <sup>2</sup> | 400               | 12.5                               | 130                      | 16.3                  | 270                        | 10.8                    | NS                    | 0.62 <sup>2</sup> | 0.3–1.1  |
| Moussaoui et al.<br>(1988)              | 1,070             | 12.1                               | 272                      | 16.7                  | 798                        | 10.7                    | <0.05                 | 0.60              | 0.4–0.9  |
| Yassa & Nair (1988)                     | 315               | 32.4                               | 150                      | 26.0                  | 165                        | 38.1                    | <0.025                | 1.76              | 1.1–2.8  |
| Yassa et al. (1988)                     | 135               | 45.0                               | 58                       | 45.5                  | 77                         | 44.8                    | NS                    | 0.97              | 0.5–1.9  |
| Youssef & Wadding-<br>ton (1988)        | 77                | 19.5                               | 51                       | 19.6                  | 26                         | 19.2                    | NS                    | 0.98              | 0.3–3.2  |
| Arisco & Holden<br>(1989)               | 90                | 5.5                                | 50                       | 2.0                   | 40                         | 10.0                    | NS                    | 5.44              | 0.6–50.8 |
| Gurge (1989)                            | 137               | 27.0                               | 101                      | 27.7                  | 36                         | 25.0                    | NS                    | 0.87              | 0.4–2.1  |
| Ko et al. (1989)                        | 866               | 8.4                                | 641                      | 10.0                  | 225                        | 6.6                     | NS                    | 0.65              | 0.4–1.2  |
| Muscettola et al.<br>(1989)             | 1,651             | 19.0                               | 991                      | 15.7                  | 660                        | 24.2                    | <0.001                | 1.73              | 1.3–2.2  |
| Stone et al. (1989)                     | 1,227             | 48.0                               | 638                      | 45.0                  | 589                        | 52.0                    | <0.05                 | 1.33              | 1.1–1.7  |
| Total                                   | 39,187            | 24.2                               | 19,337                   | 21.6                  | 19,850                     | 26.6                    |                       | 1.34              | 1.3–1.4  |

Note.—TD = tardive dyskinesia; CI = confidence interval; NS = not significant.

<sup>1</sup> $\chi^2$  test. For four studies with relatively small sample sizes (Jones and Hunter 1989, Yassa et al. 1984, Fanget et al. 1988, and Arisco and Holden 1989), Fisher's exact test was used.

<sup>2</sup>Significantly lower odds ratio.

1986) are somewhat arbitrary because 1 replaced 0 for calculation purposes.

On analyzing the prevalence of TD during the past three decades (1960–69, 1970–79, and 1980–89), we found that the mean TD prevalence during the 1960s was 13.5 percent, during the 1970s 28.6 percent, and during the 1980s 25.1 percent. Analyzing the difference between men and women in TD prevalence, we found that during the 1960s it was estimated at 9.6 percent in men and 15.6 percent in women (M:W = 1:1.6) versus 25.0 percent in men and 33.1 percent in women (M:W = 1:1.3) during the 1970s. During the 1980s, the figures were 23.5 percent for men and 27.1 percent for women (M:W = 1:1.2). Of the 12 studies during the 1960s, 6

(50%) reported that TD was significantly more common in women than in men, versus 5 of the 18 studies (27.7%) during the 1970s and 9 of the 46 studies (19.6%) during the 1980s.

**TD and Cultural Differences.** We divided the studies reviewed into those performed in North America (Canada and the United States: 36 studies with a total of 15,150 patients); Europe (Austria, England, Finland, France, Germany, Hungary, Ireland, Italy, and Sweden: 27 studies comprising 16,025 patients); Asia (China, India, Japan, and Singapore: 6 studies with a total of 5,401 patients); and Africa and the Middle East (South Africa, Morocco, and Nigeria: 5 studies including 1,777 pa-

tients) (table 2). Two studies, one international (Guy et al. 1985) and one from Australia (Rey et al. 1981), were not included because they did not belong to any of the four continent groupings described above.

The overall mean prevalence of TD in the North American studies was 27.6 percent (men 24.9%, women 30.6%, M:W = 1:1.3); for the European studies, the mean prevalence was 21.5 percent (men 17.9%, women 24.2%, M:W = 1:1.35); for the Asian studies, it was 16.6 percent (men 17.3%, women 15.8%, M:W = 1:1.1); and for the African and Middle Eastern studies, the overall mean prevalence of TD was 25.5 percent (men 15.1%, women 25.9%, M:W = 1:1). When we divided the studies of

**Table 2. Prevalence of tardive dyskinesia in different continents**

|                  | North American<br><i>n</i> = 15,150<br>(36 studies) | Europe<br><i>n</i> = 16,025<br>(27 studies) | Asia<br><i>n</i> = 5,401<br>(6 studies) | Africa<br><i>n</i> = 1,777<br>(5 studies) |
|------------------|-----------------------------------------------------|---------------------------------------------|-----------------------------------------|-------------------------------------------|
| Prevalence (%)   | 27.6                                                | 21.5                                        | 16.6                                    | 25.5                                      |
| Men (%)          | 24.9                                                | 17.9                                        | 17.3                                    | 25.1                                      |
| Women (%)        | 30.6                                                | 24.2                                        | 15.8                                    | 25.9                                      |
| M:W <sup>1</sup> | 1:1.3                                               | 1:1.35                                      | 1:1.1                                   | 1:1                                       |

<sup>1</sup>Proportion of men to women.

TD into 10-year spans, we found published reports spanning the three decades only for the North American and European Continents. Comparing the studies from these two continents, we found that the mean prevalence of TD in the North American studies during the 1960s was 11.8 percent (men 11.2%, women 11.9%, M:W = 1:1.1) versus 14.7 percent (men 8.5%, women 17.3%, M:W = 1:2.0) in the European studies. During the 1970–79 period, the North American studies had a mean TD prevalence of 29.7 percent (men 26.1%, women 32.7%, M:W = 1:1.25) versus 29.9 percent (men 24.3%, women 36.1%, M:W = 1:1.48) in the European studies. On the other hand, during the 1980–89 period, the North American studies had a higher mean prevalence of 29.1 percent (26.5% for men, 32.8% for women, M:W = 1:1.2) versus the European prevalence of 21.3 percent (men 20%, women 22.4%, M:W = 1:1.1).

**Age and Gender Interaction.** As indicated previously, only 20 studies presented mean ages for both men and women. In general, the mean ages of women were greater than those of men in all the studies, usually by 5 to 10 years. In these studies, severe TD was not significantly different between the two genders (Jones and Hunter 1969; Kennedy et al. 1971; Simpson et al. 1978; Smith et al. 1978; Perenyi and Arato 1980; Yesavage et

al. 1982; Holden 1987; Yassa and Nair 1988).

In an incidence study, Kane and colleagues (1986) found that the hazard rate for TD was slightly (but not significantly) higher for women than for men ( $\chi^2 = 2.20$ ,  $p = 0.14$ ) and that the interaction of gender by age was not significant.

We found six studies (Degkwitz and Wenzel 1967; Villeneuve et al. 1969; Brandon et al. 1971; Smith et al. 1978, 1979; Yassa et al. 1988) that presented the prevalence of TD according to age groups and gender. TD increased with age (see table 3) in women, but not in men. TD was significantly more prevalent in women than in men in the age groups 51–70 and over 70, but it was equally distributed between the genders in lower age groups. This increase in prevalence was particularly apparent in the over-70 age group.

**Gender and TD Severity.** TD severity and its assessment are controversial issues that have not been adequately addressed. At present, severe TD is classified arbitrarily according to the authors' experience (Degkwitz and Wenzel 1967; Villeneuve et al. 1969; Brandon et al. 1971; Bourgeois et al. 1976), or according to an item in a scale, such as an AIMS rating of 4 (severe) (Smith et al. 1978, 1979; Perenyi and Arato 1980; Richardson et al. 1984; Yassa et al. 1990), or according to the patient's incapacitation

from TD (Gardos et al. 1987). Of the nine studies we found (covering 7,964 patients) that discussed severe TD (Degkwitz and Wenzel 1967; Villeneuve et al. 1969; Brandon et al. 1971; Simpson et al. 1978; Smith et al. 1978; Chouinard et al. 1979; Perenyi and Arato 1980; Yesavage et al. 1982; Richardson et al. 1984), two did not differentiate between moderate and severe forms (Perenyi and Arato 1980; Richardson et al. 1984).

The mean reported prevalence of severe TD in the nine investigations was 2.2 percent (1.3% in men, 3.1% in women,  $\chi^2 = 31$ ;  $df = 1$ ;  $p < 0.001$ ). In six studies, women had more severe TD than men (Degkwitz and Wenzel 1967; Brandon et al. 1971; Simpson et al. 1978; Smith et al. 1978; Yesavage et al. 1982; Richardson et al. 1984), whereas in three studies the genders were equally affected (Villeneuve et al. 1969; Chouinard et al. 1979; Perenyi and Arato 1980).

**TD Manifestations in Men Versus Women.** Only a few studies compared TD manifestations in men and women. Two studies found that men had more faciobuccooral manifestations (Perris et al. 1979; Binder et al. 1987), while women had more generalized movements (Perris et al. 1979). Fleischhauer and colleagues (1985) found that women had more perioral, head, abdominal, trunk, hand, and knee movements than men, but move-

**Table 3. Studies comparing age and gender prevalence**

| Study                      | Patients ≤ 50 years old |                        |                   |                       | Patients 51–70 years old |                        |                   |                       | Patients > 70 years old |                        |                   |                       |
|----------------------------|-------------------------|------------------------|-------------------|-----------------------|--------------------------|------------------------|-------------------|-----------------------|-------------------------|------------------------|-------------------|-----------------------|
|                            | Men<br><i>n</i>         | %<br>Men<br>with<br>TD | Women<br><i>n</i> | %<br>Women<br>with TD | Men<br><i>n</i>          | %<br>Men<br>with<br>TD | Women<br><i>n</i> | %<br>Women<br>with TD | Men<br><i>n</i>         | %<br>Men<br>with<br>TD | Women<br><i>n</i> | %<br>Women<br>with TD |
| Degkwitz and Wenzel (1967) | 216                     | 6.9                    | 187               | 7.0                   | 79                       | 20.2                   | 231               | 29.9                  | 8                       | 25.0                   | 45                | 33.3                  |
| Villeneuve et al. (1969)   | 137                     | 8.8                    | 65                | 1.5                   | 136                      | 8.1                    | 133               | 17.3                  | 85                      | 2.0                    | 68                | 27.9                  |
| Brandon et al. (1971)      | 124                     | 4.0                    | 86                | 15.1                  | 158                      | 27.2                   | 120               | 50.0                  | 79                      | 22.8                   | 130               | 57.7                  |
| Smith et al. (1978, 1979)  | 90                      | 26.7                   | 61                | 19.7                  | 90                       | 48.9                   | 131               | 54.2                  | 66                      | 39.4                   | 68                | 66.2                  |
| Yassa et al. (1988)        | 60                      | 6.7                    | 37                | 10.8                  | 62                       | 41.9                   | 60                | 30.0                  | 28                      | 32.1                   | 68                | 60.3                  |
| Total                      | 627                     | 10.6                   | 436               | 10.8                  | 525                      | 29.3 <sup>1</sup>      | 675               | 36.3 <sup>1</sup>     | 266                     | 24.3 <sup>2</sup>      | 379               | 49.1 <sup>2</sup>     |

Note.—TD = tardive dyskinesia.

<sup>1</sup> $\chi^2 = 10.7, p < 0.001$ .

<sup>2</sup> $\chi^2 = 58.8, p < 0.001$ .

ments of the eye, neck, shoulder, and elbow did not differ. Also, Smith and colleagues (1979), using multiple regression, found that women had more lip movement than men. However, Ezrin-Waters and colleagues (1981) found that men had more affliction of the total body in the over-40 population than women did. Thus, there is no consensus regarding gender differences in TD manifestations.

**The Prevalence of Spontaneous Dyskinesia (SD).** Only five studies (Brandon et al. 1971; Delwaide and Desseilles 1977; Klawans and Barr 1982; Kane et al. 1982a; Yassa 1988) dealt with gender difference in SD (table 4). The mean prevalence of SD in these five studies was 14.5 percent (range 4%–36%). Of the men, 30 of 427 (7%) had SD versus 125 of 639 (19%) in women (M:W = 1:2.7). There were no significant age differences between the genders in these studies.

**Followup Studies.** A number of followup studies have now been published (Seeman 1981; Smith et al. 1981; Barnes et al. 1983; Casey and Toenissen 1983; Gardos et al. 1983, 1985, 1988; Kane et al. 1984; Yassa et al. 1984; Casey et al. 1986; Robinson and McCreadie 1986; Bergen et al. 1989; Fornazzari et al. 1989). Of these, only three indicated any gender differences in the outcome of TD. Seeman (1981) discontinued medication and evaluated her patients over a 2-year period. Fornazzari and colleagues (1989) followed the same patients over a 5-year period without changing the treatment. Yassa and colleagues (1984) followed their patients over a 2-year period. Of the 65 men who were reported in these three studies, 32 (49.2%) showed no change versus 43 of 73 women (58.9%). On the other hand, 20 of 65 men were reported improved (30.8%) versus 21 of 73 women (28.8%). Of the patients whose TD got worse, 13 (20%) were

men and 9 were women (12.3%). There was no difference in mean age between men and women in these three studies.

## Discussion

An obvious limitation of a literature review is that the studies reviewed vary in what detailed information they give. Also, there are likely to be differences among studies in terms of diagnostic criteria, use of rating scales, observer bias, and so on. Use of very strict criteria for including studies in this meta-analysis would have resulted in excluding many of the studies. On the other hand, including all the published studies in this field would have led to mixing findings from some unsatisfactory investigations. We chose a middle path and relied on certain minimum criteria for including studies in this overview. We also selected only appropriate studies for subanalyses, such as those on age

**Table 4. Prevalence of spontaneous dyskinesia (SD)**

| Study                       | Total population |      | Men      |      | Women    |      |
|-----------------------------|------------------|------|----------|------|----------|------|
|                             | <i>n</i>         | % SD | <i>n</i> | % SD | <i>n</i> | % SD |
| Brandon et al. (1971)       | 152              | 19.1 | 81       | 11.1 | 71       | 28.2 |
| Delwalde & Desselles (1977) | 240              | 35.8 | 64       | 15.6 | 176      | 43.8 |
| Klawans & Barr (1982)       | 423              | 6.8  | 176      | 4.5  | 247      | 8.5  |
| Kane (1982a)                | 127              | 3.9  | 53       | 0    | 74       | 6.8  |
| Yassa et al. (1988)         | 124              | 4.0  | 53       | 5.7  | 71       | 2.8  |
| Total                       | 1,066            | 13.9 | 427      | 7.4  | 639      | 18.0 |

or severity of TD. It is conceivable that dropping some studies may have skewed the overall data set; this alternative is better, however, than including methodologically faulty studies.

Our review of the prevalence of TD indicates that TD was reportedly present in an estimated 24.2 percent of the neuroleptic-treated population studied, covering nearly 40,000 patients. The prevalence of TD apparently increased from 13.5 percent during the 1960s to 28.6 percent during the 1970s and stabilized at 25.0 percent during the 1980s. One possible explanation for this phenomenon may be that a number of studies carried out during the 1960s did not use scales to measure TD, and some included only patients with buccal movements, thus missing some cases that may today be diagnosed as exhibiting TD. Other changes that have occurred in the past three decades, such as improvements in study designs, narrowing of the concept of schizophrenia, and increased awareness of TD, may also have contributed to the observed differences in TD prevalence. Nonetheless, we believe it is notable that the reported mean prevalence of TD did not change appreciably from the 1970s to the 1980s. The limitation in combining data from investigations done at different times must, of course, be taken into account.

We found that the mean W:M OR of TD was 1.34 ( $CI_{95} = 1.3-1.4$ ). The W:M OR was significantly higher in 15 of the studies reviewed, while only two studies (Perenyi and Arato 1980; Moussaoui et al. 1988) found a significantly higher M:W OR. When studies are divided by decade (1960-69, 1970-79, 1980-89), the M:W ratio seemed to narrow in the latter decades (from 1:1.6 during the 1960s to 1:1.2 during the 1980s), although many studies found that the women assessed were older than the men. Although there is no clear explanation for this finding, it is conceivable that the narrowing of the concept of schizophrenia in the *DSM-III* (American Psychiatric Association 1980) might have had differential effects on men and women. Thus, perhaps more women (than men) with an affective disorder (which is a risk factor for TD) who would have been diagnosed as suffering from schizophrenia in the previous decades are no longer receiving a diagnosis of schizophrenia and are not being treated with neuroleptics.

We also found that TD was not as prevalent among Asians (17%) as among patients in North America (28%), Europe (22%), or the Middle East (26%). Several possible reasons for this discrepancy between Asian and North American studies may be considered. Of the six Asian studies

reviewed (Ogita 1972; Doongaji et al. 1982; Itoh et al. 1984; Kok and Christopher 1985; Binder et al. 1987; Ko et al. 1989), only one was based on outpatient populations (Kok and Christopher 1985). The same study used more stringent diagnostic criteria for minimum TD severity. Outpatient populations have been reported to have less TD than inpatients, at least in Singapore, from which the Kok and Christopher population was drawn (Tan and Tay 1991). Tan and Tay found that psychogeriatric inpatients in Singapore had a TD prevalence of 31.5 percent versus 10.5 percent in psychogeriatric outpatients. Hence, the lower prevalence of TD in the Asian studies cannot be attributed to including only outpatients. Also, in four of the five studies younger patients (aged 40 or younger) formed a large majority of the patient population. It is well known that aging increases the prevalence of TD (Jeste et al. 1990). This may also explain the nearly equal M:W ratio found in these studies.

It is also conceivable that physicians in Asia treat their patients with smaller doses than their counterparts in the Western countries do. Indeed, the only Asian study (Binder et al. 1987) that used high daily doses of neuroleptic (mean daily dose of 1,633 mg chlorpromazine equivalent) found a higher prevalence of TD (35%) than



the other studies, which used lower doses (in the range of 300 mg/day chlorpromazine equivalent).

Although the above explanations may be plausible, the constitutional factors have not been fully explored. An intriguing finding by Tan and Tay (1991) was that the TD prevalence differed with ethnicity. Malaysian, Indian, and Chinese patients in their study all had a similar prevalence of TD (21% to 27%) while 54 percent of the Eurasian patients had TD. Thus, at present, the influence of ethnicity on the prevalence of TD remains to be studied.

A limitation of these comparisons is that the racial genetic makeup of the patients included in these studies was usually not described; a single study might have included patients from different racial and ethnic backgrounds. Also, there are likely to be differences among patients as well as treatment practices in countries from the same continent. Hence, the cross-cultural comparisons should be interpreted with caution. We recommend that ethnic background be fully described and compared in future prevalence studies.

Table 3 suggests that only women had a continuing increase in the prevalence of TD with age. This increase was fivefold when women aged over 70 were compared to women younger than 50. In men, this increase in the prevalence of TD with age was only twofold when the two extremes of age groups were compared.

TD severity and its assessment are controversial issues that have not been adequately addressed (Yassa et al. 1990). At present, there is an arbitrary classification of severe TD according to the investigators' experience (Degkwitz and Wenzel 1967; Villeneuve et al. 1969; Brandon et al. 1971; Bourgeois et al. 1976), or according to an item in a scale, such as an AIMS rat-

ing of 4 (severe) (Smith et al. 1978, 1979; Perenyi and Arato 1980; Richardson et al. 1984; Yassa et al. 1990), or according to the patient's incapacitation from TD (Gardos et al. 1987). Thus, one may expect a large variation in the definition of severe TD according to the authors' criterion. Nonetheless, women seemed to have more severe TD than men, with a mean prevalence of 3.1 percent versus 1.3 percent; TD was more common in women than men, particularly in older patients (aged 50 and older), and TD in women tended to be more severe than in men.

SD is the presence of abnormal involuntary movements without prior use of neuroleptics and without other known causes of dyskinesia. As noted, only five studies dealt with the prevalence of SD in relation to gender. Men had less evidence of SD than women, following the general trend noted in TD.

Few followup studies have compared men and women. In these studies, there was no consistent evidence that the prognosis and course of TD differed between men and women. However, this point needs further investigation.

Several hypotheses have been put forward to explain the discrepancy in the TD prevalence between men and women. Some investigators reported that women tended to have more chronic illness and longer hospitalizations than men (Kennedy et al. 1971). There are reports that women tended to receive larger doses (Degkwitz and Wenzel 1967; Kane and Smith 1982) or longer duration of neuroleptic treatment (Doongaji et al. 1982) than men. Evidence has accumulated in studies conducted on schizophrenic patients, however (most of the TD prevalence studies referred to in this review dealt mainly with schizophrenic patients), that women have a

better prognosis than men (Huber et al. 1980; Seeman 1983; Goldstein 1988; Yassa et al. 1990). Only in follow-up studies of more than 20 years does one find that the prognosis of schizophrenia in the genders is similar (Yassa et al. 1991). It is thus difficult to attribute the higher prevalence of TD in women to poorer prognosis schizophrenia.

Another possible explanation is the fact that in some studies, women were older than men. Women have a longer lifespan than men and therefore tend to be overrepresented in surveys of older patients (Yesavage et al. 1982). Aging is accompanied by a tendency for developing more severe TD (Smith and Baldessarini 1980; Yassa et al. 1986), and studies that failed to include older women in their samples reported an absence of severe TD (Gardos et al. 1980; Mukherjee et al. 1982). In our review, we found 20 studies in which women were older than men. Of these, seven indicated a higher prevalence of TD in women than men (Jones and Hunter 1969; Kennedy et al. 1971; Simpson et al. 1978; Smith et al. 1978; Yesavage et al. 1982; Holden 1987; Yassa 1988). Age did not seem to increase the prevalence of TD in men to the same degree as in women. Thus, older women seem to be more vulnerable to TD, especially the severe forms of TD.

A third possibility is that psychosis may develop later in life in women than in men. Some studies have indicated this finding (Harris and Jeste 1988). TD was found to develop with a shorter period of neuroleptic treatment and in a more severe form when neuroleptics were given later in life than when neuroleptics were started earlier in life (Jeste et al. 1982a). Another possible explanation is that women may be protected by estrogens earlier in life. Estrogens have an antidopaminergic activity (Raymond et

al. 1978), thus possibly protecting premenopausal women from developing TD. This may explain a reported finding that premenopausal women needed lower doses of neuroleptics than men of the same age (Seeman 1983). Some studies have reported improvement in TD during estrogen administration in both men and women (Villeneuve et al. 1980), although this finding has not been replicated by others (Jeste et al. 1988).

A caveat in our review of gender differences in TD is a lack of research on plasma concentrations of neuroleptics comparing the genders. To date, most of the studies on plasma concentrations of neuroleptics have been conducted on men alone (Yesavage et al. 1987), or on women alone (Jeste et al. 1982b), or have not compared plasma concentrations in the genders (Csernansky et al. 1983; Smith et al. 1983).

Finally, it is possible that catecholaminergic changes with aging may play a role in the development of TD in older patients (Smith and Baldessarini 1980; Jeste and Wyatt 1987). The role of these changes in the pathophysiology of TD needs further study.

## References

- Ahrens, T.N.; Sramek, J.J.; Herrera, J.M.; Jewett, C.M.; and Alcorn, V.E. Pharmacy-based screening program for tardive dyskinesia. *Drug Intelligence in Clinical Pharmacy*, 22:205-208, 1988.
- Alexopoulos, G. Lack of complaints in schizophrenics with tardive dyskinesia. *Journal of Nervous and Mental Disease*, 167:125-126, 1979.
- American Psychiatric Association. *DSM-III: Diagnostic and Statistical Manual of Mental Disorders*. 3rd ed. Washington, DC: The Association, 1980.
- Ananth, J., and Yassa, R. Tardive dyskinesia and skin pigmentation. *British Journal of Psychiatry*, 141:194-195, 1982.
- Arisco, J.P., and Holden, L.D. Prevalence of tardive dyskinesia in private psychiatric inpatients. *Texas Medicine*, 85:25-28, 1989.
- Asnis, G.; Leopold, M.A.; Duvoisin, R.C.; and Schwartz, A.H. A survey of tardive dyskinesia in psychiatric outpatients. *American Journal of Psychiatry*, 134:1367-1370, 1977.
- Baldessarini, R.J. Tardive dyskinesia. In: *Task Force Report 18*. Washington, DC: American Psychiatric Association, 1979.
- Barnes, T.R.E. The present status of tardive dyskinesia and akathisia in the treatment of schizophrenia. *Psychiatric Development*, 4:301-319, 1987.
- Barnes, T.R.E.; Kidger, T.; and Gore, S.M. Tardive dyskinesia: A 3-year follow-up study. *Psychological Medicine*, 13:71-81, 1983.
- Bell, R.C.H., and Smith, R.C. Tardive dyskinesia: Characterization and prevalence in a state-wide system. *Journal of Clinical Psychiatry*, 39:39-47, 1978.
- Bergen, J.A.; Egland, E.A.; Campbell, J.A.; Jenkins, P.; Kelleher, K.; Richards, A.; and Beumont, P.J. The course of tardive dyskinesia in patients on long-term neuroleptics. *British Journal of Psychiatry*, 154:523-528, 1989.
- Binder, R.; Kazamatsuri, H.; Nishimura, T.; and McNeil, D.E. Tardive dyskinesia and neuroleptic-induced parkinsonism in Japan. *American Journal of Psychiatry*, 144:1494-1496, 1987.
- Bourgeois, M.; Graux, C.; and Arretche-Berthelot, N. Les dyskinesies tardives des neuroleptiques: Enquete sur 1660 malades d'hospital psychiatrique. *Annales Medico-Psychologiques*, 134:737-746, 1976.
- Brainin, M.; Ressler, T.L.; and Zeitlhofer, J. Tardive dyskinesia: Clinical correlation with computed tomography in patients less than 60 years. *Journal of Neurology, Neurosurgery and Psychiatry*, 46:1037-1040, 1983.
- Branchey, M., and Branchey, L. Patterns of psychotropic drug use and tardive dyskinesia. *Journal of Clinical Psychopharmacology*, 4:41-45, 1984.
- Brandon, S.; McClelland, H.A.; and Protheroe, C. A study of facial dyskinesia in a mental hospital population. *British Journal of Psychiatry*, 118:171-184, 1971.
- Casey, D.E., and Keepers, G.A. Neuroleptic side effects: Extrapyramidal syndromes and tardive dyskinesia. *Psychopharmacology Series*, 5:74-93, 1988.
- Casey, D.E.; Povlsen, U.J.; Meidahl, B.; and Gerlach, J. Neuroleptic-induced tardive dyskinesia and parkinsonism: Changes during several years of continuing treatment. *Psychopharmacology Bulletin*, 22:250-253, 1986.
- Casey, D.E., and Toeniessen, L.M. Neuroleptic treatment of tardive dyskinesia: Can it be developed into a clinical strategy for long-term treatment? *Modern Problems of Pharmacopsychiatry*, 21:65-79, 1983.
- Chouinard, G.; Annable, L.; and Ross-Chouinard, A. Supersensitivity psychosis and tardive dyskinesia: A survey of schizophrenic outpatients. *Psychopharmacology Bulletin*, 22:891-896, 1986.
- Chouinard, G.; Annable, L.; Ross-Chouinard, A.; and Nestoros, J.N. Factors related to tardive dyskinesia. *American Journal of Psychiatry*, 136:79-83, 1979.

- Cole, J.O.; Gardos, G.; and Schniebolck, S. Differences in incidence of tardive dyskinesia with different neuroleptics: In: Casey, D.E., and Gardos, G., eds. *Tardive Dyskinesia and Neuroleptics: From Dogma to Reason*. Washington, DC: American Psychiatric Press, 1986. pp. 33-54.
- Crane, G.E. Tardive dyskinesia in schizophrenic patients treated with psychotropic drugs. *Agressologie*, 9:209-218, 1968.
- Crane, G.E. High doses of trifluoperazine and tardive dyskinesia. *Archives of Neurology*, 22:176-180, 1970.
- Crane, G.E., and Paulson, G. Involuntary movements in a sample of chronic mental patients and their relation to the treatment with neuroleptics. *International Journal of Neuropsychiatry*, 3:286-291, 1967.
- Crane, G.E., and Smeets, R.A. Tardive dyskinesia and drug therapy in geriatric patients. *Archives of General Psychiatry*, 30:341-343, 1974.
- Csernansky, J.G.; Kaplan, J.; Holman, C.A.; and Hollister, L.E. Serum neuroleptic activity, prolactin and tardive dyskinesia in schizophrenic outpatients. *Psychopharmacology*, 81:115-118, 1983.
- Cunningham-Owens, D.G.; Johnstone, E.C.; and Frith, C.D. Spontaneous involuntary disorders of movements. *Archives of General Psychiatry*, 39:452-461, 1982.
- Degkwitz, R., and Wenzel, W. Persistent extrapyramidal side effects after long-term application of neuroleptics. In: Brill, H., and Amsterdam, J., eds. *Neuropsychopharmacology*. Amsterdam: Excerpta Medica, 1967. pp. 608-615.
- Delance, F. Reported in Bourgeois, M.: Les dyskinesies tardives des neuroleptiques en France. *L'Encephale*, 14:195-201, 1988.
- Delwaide, P.J., and Desseilles, M. Spontaneous buccolinjuofacial dyskinesia in the elderly. *Acta Neurologica Scandinavica*, 36:256-262, 1977.
- Demars, J.-P.C.A. Neuromuscular effects of long-term phenothiazine medication, electroconvulsive therapy and leucotomy. *Journal of Nervous and Mental Disease*, 143:73-79, 1966.
- Dincmen, K. Chronic psychotic choreoathetosis. *Diseases of the Nervous System*, 27:399-402, 1966.
- Doongaji, D.; Jeste, D.V.; Jape, N.M.; Sheth, A.S.; Apte, J.S.; Vahia, V.N.; Desai, A.B.; Vahora, S.A.; Thatte, S.; Vevaina, T.; and Bharadwaj, J. Tardive dyskinesia in India: A prevalence study. *Journal of Clinical Psychopharmacology*, 2:341-344, 1982.
- Driesens, F. Neuroleptic medication facilitates the natural occurrence of tardive dyskinesia: A critical review. *Acta Psychiatrica Belgica*, 88:195-205, 1988.
- Dynes, J.B. Oral dyskinesias: Occurrence and treatment. *Diseases of the Nervous System*, 31:854-859, 1970.
- Edwards, H. The significance of brain damage in persistent oral dyskinesia. *British Journal of Psychiatry*, 116:271-275, 1970.
- Ezrin-Waters, C.; Seeman, M.V.; and Seeman, P. Tardive dyskinesia in schizophrenic outpatients: Prevalence and significant variables. *Journal of Clinical Psychiatry*, 42:16-22, 1981.
- Famujiwa, O.O.; Eccleston, D.; Donaldson, A.A.; and Garside, R.F. Tardive dyskinesia and dementia. *British Journal of Psychiatry*, 135:500-504, 1979.
- Fanget, F.; Henry, E.; and Aimard, G. Incidence des dyskinesies tardives sous traitement neuroleptique. *La Presse Medicale*, 15:2147-2150, 1986.
- Fann, W.E.; Davis, J.M.; and Janowsky, D.S. The prevalence of tardive dyskinesias in mental hospital patients. *Diseases of the Nervous System*, 33:182-186, 1972.
- Fleischhauer, J.; Kocher, J.; Hobi, V.; and Gilsdorf, U. Prevalence of tardive dyskinesia in a clinic population: Dyskinesia—Research and treatment. *Psychopharmacology*, 2(Suppl.):162-172, 1985.
- Fornazzari, X.; Grossman, H.; Thornton, J.; and Seeman, M.V. Tardive dyskinesia: A five-year follow-up. *Canadian Journal of Psychiatry*, 34:700-703, 1989.
- Gardos, G.; Cole, J.O.; Perenyi, A.; Casey, D.E.; Samu, I.; Kallos, M.; and Schniebolck, S. Five-year follow-up study of tardive dyskinesia. In: Kemali, D., and Racagni, G., eds. *Chronic Treatments in Neuropsychiatry*. New York: Raven Press, 1985. pp. 37-42.
- Gardos, G.; Cole, J.O.; Salomon, M.; and Schniebolck, S. Clinical forms of severe tardive dyskinesia. *American Journal of Psychiatry*, 144:895-902, 1987.
- Gardos, G.; Perenyi, A.; Cole, J.O.; Samu, I.; and Kallos, M. Tardive dyskinesia: Changes after three years. *Journal of Clinical Psychopharmacology*, 3:315-318, 1983.
- Gardos, G.; Perenyi, A.; Cole, J.O.; Samu, I.; Kocsis, E.; and Casey, D.E. Seven-year follow-up of tardive dyskinesia in Hungarian outpatients. *Neuropsychopharmacology*, 1:169-172, 1988.
- Gardos, G.; Samu, I.; Kallos, M.; and Cole, J.O. Absence of severe tardive dyskinesia in Hungarian schizophrenic outpatients. *Psychopharmacology*, 71:29-34, 1980.
- Goldberg, S.; Shenoy, R.S.; Julius, D.; Hamer, R.M.; Ross, B.; Minten,

- T.; and Spiro, M. Does long-acting injectable neuroleptic protect against tardive dyskinesia? *Psychopharmacology Bulletin*, 18:177-179, 1982.
- Goldstein, J.M. Gender differences in the course of schizophrenia. *American Journal of Psychiatry*, 145:684-689, 1988.
- Gurge, O. Tardive dyskinesia in schizophrenics. *Acta Psychiatrica Scandinavica*, 76:523-528, 1987.
- Gurge, O. The significance of subtyping tardive dyskinesia: A study of prevalence and associated factors. *Psychological Medicine*, 19:121-128, 1989.
- Guy, W., ed. *ECDEU Assessment Manual for Psychopharmacology*, revised. DHEW Pub. No. (ADM)76-338. Rockville, MD: National Institute of Mental Health, 1976.
- Guy, W.; Ban, T.A.; and Wilson, W.H. An international survey of tardive dyskinesia. *Progress in Neuro-psychopharmacology and Biological Psychiatry*, 9:401-405, 1985.
- Harris, M.J., and Jeste, D.V. Late-onset schizophrenia: An overview. *Schizophrenia Bulletin*, 14:39-55, 1988.
- Heinrich, K.; Wagener, I.; and Bender, H.-J. Spate extrapyramidal hyperkinesen bei neuroleptischer langzeittherapie. *Pharmacopsychiatry/Neuropsychopharmacology*, 1:169-195, 1968.
- Hippius, V., and Lange, J. Zur problematik der späten extrapyramidalen hyperkinesen nach Langfristiger neuroleptischer therapie. *Arzneimittel-Forschung*, 20:888-890, 1970.
- Holden, T.J. Tardive dyskinesia in long-term hospitalized Zulu psychiatric patients. *South African Medical Journal*, 71:88-90, 1987.
- Holden, T.J.; Sandler, R.; and Myslobodsky, M. Tardive dyskinesia prevalence and subtypes at Valkenberg Hospital, Cape Town. *South African Medical Journal*, 66:132-134, 1984.
- Huber, G.; Gross, G.; Schüttler, R.; and Linz, M. Longitudinal studies of schizophrenic patients. *Schizophrenia Bulletin*, 6:592-605, 1980.
- Hunter, R.; Earl, C.J.; and Thornicroft, S. An apparently irreversible syndrome of abnormal movements following phenothiazine medication. *Proceedings of the Royal Society of Medicine*, 57:758-762, 1964.
- Itoh, M.; Fujii, Y.; Kamisada, M.; and Kamishima, K. Recent trends in the prevalence of tardive dyskinesia in Japan. *Progress in Neuro-Psychopharmacology and Biological Psychiatry*, 8:39-49, 1984.
- Jeste, D.V.; Kleinman, J.E.; Potkin, S.G.; Luchins, D.J.; and Weinberger, D.R. Ex uno multi: Subtyping the schizophrenia syndrome. *Biological Psychiatry*, 17:199-222, 1982a.
- Jeste, D.V.; Krull, A.J.; and Kilbourn, K. Tardive dyskinesia: Managing a common neuroleptic side effect. *Geriatrics*, 45:49-58, 1990.
- Jeste, D.V.; Linnoila, M.; Wagner, R.L.; and Wyatt, R.J. Serum neuroleptic concentrations and tardive dyskinesia. *Psychopharmacology*, 76:377-380, 1982b.
- Jeste, D.V.; Lohr, J.B.; Clark, K.; and Wyatt, R.J. Pharmacological treatment of tardive dyskinesia in the 1980's. *Journal of Clinical Psychopharmacology*, 8(Suppl.):38S-48S, 1988.
- Jeste, D.V.; Potkin, S.G.; Sinha, S.; Feder, S.; and Wyatt, R.J. Tardive dyskinesia—Reversible and persistent. *Archives of General Psychiatry*, 36:585-590, 1979.
- Jeste, D.V., and Wyatt, R.J. Changing epidemiology of tardive dyskinesia. *American Journal of Psychiatry*, 138:297-309, 1981.
- Jeste, D.V., and Wyatt, R.J. *Understanding and Treating Tardive Dyskinesia*. New York: Guilford Press, 1982.
- Jeste, D.V., and Wyatt, R.J. Aging and tardive dyskinesia. In: Miller, N.E., and Cohen, G.D., eds. *Schizophrenia and Aging: Schizophrenia, Paranoid and Schizophreniform Disorders in Later Life*. New York: Guilford Press, 1987. pp. 275-286.
- Jones, M., and Hunter, R. Abnormal movements in patients with chronic psychiatric illness. In: Crane, G.E., and Gardner, R., eds. *Psychotropic Drugs and Dysfunction of the Basal Ganglia*. Washington, DC: Public Health Service, 1969. pp. 53-65.
- Jus, A.; Pineau, R.; Lachance, R.; Pelchat, G.; Jus, K.; Pires, P.; and Villeneuve, R. Epidemiology of tardive dyskinesia. Part I. *Diseases of the Nervous System*, 37:210-214, 1976.
- Kane, J.M., and Smith, J.M. Tardive dyskinesia: Prevalence and risk factors, 1959 to 1979. *Archives of General Psychiatry*, 39:473-481, 1982.
- Kane, J.M.; Weinhold, P.; Kinon, B.; Wegner, J.; and Leader, M. Prevalence of abnormal involuntary movements ("spontaneous dyskinesia") in the normal elderly. *Psychopharmacology*, 77:105-108, 1982a.
- Kane, J.M.; Woerner, M.; Borenstein, M.; Wegner, J.; and Lieberman, J. Integrating incidence and prevalence of tardive dyskinesia. *Psychopharmacology Bulletin*, 22:254-258, 1986.
- Kane, J.M.; Woerner, M.; and Lieberman, J. The prevalence of tardive dyskinesia. *Psychopharmacology Bulletin*, 21:136-139, 1985.
- Kane, J.M.; Woerner, M.; Weinhold, P.; and Lieberman, J. Incidence of tardive dyskinesia: Five-year data

- from a prospective study. *Psychopharmacology Bulletin*, 20:387-389, 1984.
- Kane, J.M.; Woerner, M.; Weinhold, P.; Wegner, J.; and Kinon, B. A prospective study of tardive dyskinesia development: Preliminary results. *Journal of Clinical Psychopharmacology*, 2:345-359, 1982b.
- Kennedy, P.F.; Hershon, H.I.; and McGuire, R.J. Extrapyramidal disorders after prolonged phenothiazine therapy. *British Journal of Psychiatry*, 118:509-518, 1971.
- Klawans, H.L., and Barr, A. Prevalence of spontaneous buccal dyskinesia in the elderly. *Neurology*, 32:558-559, 1982.
- Ko, G.N.; Zhang, L.D.; Yan, W.W.; Zhang, M.D.; Buchner, D.; Xia, Z.Y.; Wyatt, R.J.; and Jeste, D.V. The Shanghai 800: Prevalence of tardive dyskinesia in a Chinese psychiatric hospital. *American Journal of Psychiatry*, 146:387-389, 1989.
- Kok, L.P., and Christopher, Y.S. Tardive dyskinesia in schizophrenic outpatients. *Annals of the Academy of Medicine*, 14:87-90, 1985.
- Kolakowska, T.; Williams, A.O.; and Arden, M. Tardive dyskinesia and current dose of neuroleptic drugs. [Letter to the Editor] *Archives of General Psychiatry*, 43:614, 1986.
- Kulhanek, F.; Schwitzer, J.; Hebenstreit, G.; Hinterhuber, H.; and Schubert, H. Tardive dyskinesia and correlating factors in a mental hospital in Austria. *Neuropsychiatric Clinics*, 3:281-287, 1984.
- Lajeunesse, C., and Villeneuve, A. Les dyskinesies tardives. Apres plus de deux decennies. *L'Encephale*, 15: 471-485, 1989.
- Lam, R.W.; Jeste, S.D.; and Jeste, D.V. Preventing neuroleptic-induced tardive dyskinesia in adults and children. *L'Encephale*, 14:251-255, 1988.
- Lehmann, H.E., and Ban, T.A. Sex differences in long-term adverse effects of phenothiazines. In: Forrest, I.S.; Carr, C.J.; and Usdin, E., eds. *The Phenothiazines and Structurally Related Drugs*. New York: Raven Press, 1974. pp. 249-254.
- Lehmann, H.E.; Ban, T.A.; and Saxena, S.M. A survey of extrapyramidal manifestations in the inpatient population of a psychiatric hospital. *Laval Medicine*, 41:909-916, 1970.
- Lieberman, J.; Kane, J.M.; Woerner, M.; and Weinhold, P. Prevalence of tardive dyskinesia in elderly samples. *Psychopharmacology Bulletin*, 20: 22-26, 1984.
- Lohr, J.B., and Wisniewski, A.A. *Movement Disorders. A Neuropsychiatric Approach*. New York: Guilford Press, 1987.
- McCreadie, R.G.; Barron, E.T.; and Winslow, G.S. The Nithsdale schizophrenia survey. II: Abnormal movements. *British Journal of Psychiatry*, 140:587-590, 1982.
- Morgenstern, H.; Glazer, W.M.; Gibowski, L.D.; and Holmbey, S. Predictors of tardive dyskinesia: Results of a cross-sectional study in an outpatient population. *Journal of Chronic Diseases*, 40:319-327, 1987.
- Moussaoui, D.; Douki, S.; Bentounsi, B.; Otari, A.; Chorfi, M.; Mamou, A.; and Benamor, L. Epidemiologie des dyskinesies tardives au Maghreb. *L'Encephale*, 14:203-208, 1988.
- Mukherjee, S.; Rosen, A.M.; Cardinas, C.; Varia, V.; and Olarte, S. Tardive dyskinesia in schizophrenic outpatients. *Archives of General Psychiatry*, 39:466-469, 1982.
- Muscettola, G.; Pampollona, S.; Barbato, G.; Casillo, M.; and Bollini, P. Tardive dyskinesia in Italy: Preliminary findings. *Archives of General Psychiatry*, 46:754-755, 1989.
- Ogita, K. A study of tardive dyskinesias following prolonged administration of neuroleptics. *Keio Journal of Medicine*, 50:297-310, 1972.
- Paulson, G. Permanent or complex dyskinesias in the aged. *Geriatrics*, 25:105-110, 1968.
- Perenyi, A., and Arato, M. Tardive dyskinesia in Hungarian psychiatric wards. *Psychosomatics*, 21:904-909, 1980.
- Perris, C.; Dimitrijevic, P.; Jacobson, L.; Paulson, P.; Rapp, W.; and Froberg, H. Tardive dyskinesia in psychiatric patients treated with neuroleptics. *British Journal of Psychiatry*, 135:509-514, 1979.
- Pryce, I.G., and Edwards, H. Persistent oral dyskinesia in female mental hospital patients. *British Journal of Psychiatry*, 112:983-987, 1966.
- Ramsay, F.M., and Millard, P.H. Tardive dyskinesia in the elderly. *Age and Aging*, 15:145-150, 1986.
- Raymond, F.; Beaulieu, M.; and Labrie, F. Potent antidopaminergic activity of estradiol at the pituitary level on prolactin release. *Science*, 200:1173-1175, 1978.
- Rey, J.M.; Hunt, G.E.; and Johnson, G.F.S. Assessment of tardive dyskinesia in psychiatric outpatients using a standardized rating scale. *Australian and New Zealand Journal of Psychiatry*, 15:33-37, 1981.
- Richardson, M.A.; Hangland, G.; Pass, R.; and Craig, T.J. The prevalence of tardive dyskinesia in a mentally retarded population. *Psychopharmacology Bulletin*, 22:245-249, 1986.
- Richardson, M.A.; Pass, R.; Craig, T.J.; and Vickers, E. Factors influencing the prevalence and severity of tar-

- dive dyskinesia. *Psychopharmacology Bulletin*, 30:33-38, 1984.
- Rittmannsberger, H., and Schony, W. Prevalenz tardiven dyskinesie bei langzeit-hospitalisierten schizophrenen patienten. *Nervenarzt*, 57:116-118, 1986.
- Robinson, A.D.T., and McCreddie, R.G. The Nithsdale schizophrenia survey. V: Follow-up of tardive dyskinesia at 3½ years. *British Journal of Psychiatry*, 149:621-623, 1986.
- Seeman, M.V. Tardive dyskinesia: Two-year recovery. *Comprehensive Psychiatry*, 22:189-192, 1981.
- Seeman, M.V. Interaction of sex, age and neuroleptic dose. *Comprehensive Psychiatry*, 24:125-128, 1983.
- Shah, N.S., and Donald, A.G., eds. *Movement Disorders*. New York: Plenum Press, 1986.
- Siede, H., and Muller, H.F. Choreiform movements as side effects of phenothiazine medication in geriatric patients. *Journal of the American Geriatrics Society*, 15:517-522, 1967.
- Simpson, G.M.; Lee, J.H.; Soubok, B.; and Gardos, G. A rating scale for tardive dyskinesia. *Psychopharmacology*, 64:171-179, 1979.
- Simpson, G.M.; Pi, E.H.; and Sramek, J.J. An update on tardive dyskinesia. *Hospital and Community Psychiatry*, 37:362-369, 1986.
- Simpson, G.M.; Varga, E.; Lee, J.H.; and Zoubok, B. Tardive dyskinesia and psychotropic drug history. *Psychopharmacology*, 58:117-124, 1978.
- Smith, J.M., and Baldessarini, R.J. Changes in prevalence, severity and recovery in tardive dyskinesia with age. *Archives of General Psychiatry*, 37:1368-1373, 1980.
- Smith, J.M.; Burke, M.A.; and Moon, C.A. Long-term changes in AIMS ratings in relation to medication history. *Psychopharmacology Bulletin*, 17:120-121, 1981.
- Smith, J.M.; Kucharski, L.T.; Eblen, C.; Knutsen, E.; and Linn, C. An assessment of tardive dyskinesia in schizophrenic outpatients. *Psychopharmacology*, 64:99-104, 1978.
- Smith, J.M.; Oswald, W.T.; Kucharski, L.T.; and Watermen, L.J. Tardive dyskinesia: Age and sex differences in hospitalized schizophrenics. *Psychopharmacology*, 58:207-211, 1979.
- Smith, R.C.; Misra, C.H.; Allen, R.; and Gordon, J. Dosage and blood levels of neuroleptics in tardive dyskinesia. *Modern Problems of Pharmacopsychiatry*, 21:87-96, 1983.
- Stone, R.K.; May, J.E.; Alvarez, W.F.; and Ellman, G. Prevalence of dyskinesia and related movement disorders in a developmentally disabled population. *Journal of Mental Deficiency Research*, 33:41-53, 1989.
- Tan, C.H., and Tay, L.K. Tardive dyskinesia in elderly psychiatric patients in Singapore. *Australian and New Zealand Journal of Psychiatry*, 25:119-122, 1991.
- Tanner, C.M. Drug-induced movement disorders (tardive dyskinesia and dopa-induced dyskinesia). In: Van Kan, P.J.; Bruyn, G.W.; and Klawans, H.D., eds. *Handbook of Clinical Neurology, Extrapyramidal Disorders*. New York: Elsevier Science Publishers, 1986. pp. 185-204.
- Turunen, S., and Achté, K.A. The buccolinguomasticatory syndrome as a side effect of neuroleptic therapy. *Psychiatric Quarterly*, 41:268-279, 1967.
- Uhrbrand, L., and Faurbye, A. Reversible and irreversible dyskinesia after treatment with perphenazine, chlorpromazine, reserpine and ECT. *Psychopharmacologia*, 1:408-418, 1960.
- Villeneuve, A.; Cazejust, T.; and Cote, M. Estrogens in tardive dyskinesia in male psychiatric patients. *Neuropsychobiology*, 6:145-151, 1980.
- Villeneuve, A., and Lajeunesse, C. Aspects cliniques des dyskinesies tardives induites par les neuroleptiques. *L'Encephale*, 14:209-214, 1988.
- Villeneuve, A.; Lavalée, J.-C.; and Lemieux, L.-H. Dyskinesie tardive postneuroleptique. *Laval Medical*, 40:832-837, 1969.
- Waddington, J.L. Tardive dyskinesia in schizophrenia and other disorders: Associations with aging, cognitive dysfunction and structural brain pathology in relation to neuroleptic exposure. *Human Psychopharmacology*, 2:11-22, 1987.
- Waddington, J.L., and Youssef, H.A. Late onset involuntary movements in chronic schizophrenia: Age-related vulnerability to "tardive" dyskinesia independent of extent of neuroleptic medication. *Irish Medical Journal*, 78:143-146, 1985.
- Waddington, J.L., and Youssef, H.A. Involuntary movements and cognitive dysfunction in late onset schizophrenic outpatients. *Irish Medical Journal*, 79:347-350, 1986.
- Williams, R., and Dalby, J.T. Tardive dyskinesia in outpatient schizophrenics treated with depot phenothiazines. *Journal of Clinical Psychopharmacology*, 6:318-319, 1986.
- Wojcik, J.D.; Gelenberg, A.J.; LaBrie, R.; and Mieske, M. Prevalence of tardive dyskinesia in an outpatient population. *Comprehensive Psychiatry*, 21:370-380, 1980.
- Wolf, M.E.; Ryan, J.J.; and Mosnaim, A.D. Organicity and tardive dyskinesia. *Psychosomatics*, 23:475-480, 1982.
- Yagi, G.; Ogita, K.; Ohtsuka, N.; Itoh, H.B.; and Miura, S. Persistent

dyskinesia after long-term treatment with neuroleptics in Japan. *Keio Journal of Medicine*, 25:25-27, 1976.

Yassa, R., Tardive dyskinesia and anticholinergic drugs. *L'Encephale*, 14:233-239, 1988.

Yassa, R.; Ananth, J.; Cordozo, S.; and Ally, J. Tardive dyskinesia in an outpatient population: Prevalence and predisposing factors. *Canadian Journal of Psychiatry*, 28:391-394, 1983.

Yassa, R., and Nair, V. The association of tardive dyskinesia and pseudo-parkinsonism. *Progress in Neuropsychopharmacology and Biological Psychiatry*, 12:909-914, 1988.

Yassa, R.; Nair, V.; Iskandar, H.; and Schwartz, G. Factors in the development of severe forms of tardive dyskinesia. *American Journal of Psychiatry*, 147:1156-1163, 1990.

Yassa, R.; Nair, V.; and Schwartz, G. Tardive dyskinesia and the primary psychiatric diagnosis. *Psychosomatics*, 25:135-138, 1984.

Yassa, R.; Nair, V.; and Schwartz, G. Early versus late onset psychosis and tardive dyskinesia. *Biological Psychiatry*, 21:1291-1297, 1986.

Yassa, R.; Nastase, C.; Camille, Y.; and Belzile, L. Tardive dyskinesia in a psychogeriatric population. In: Wolf, M.E., and Mosnaim, A.D., eds. *Tardive Dyskinesia: Biological Mechanisms and Clinical Aspects*. Washington, DC: American Psychiatric Press, 1988. pp. 123-133.

Yassa, R.; Uhr, S.; and Jeste, D.V. Gender differences in chronic schizophrenia: Need for further research. In: Light, E., and Lebowitz, B.D., eds. *The Elderly With Chronic Mental Illness*. New York: Springer, 1991. pp. 16-30.

Yesavage, J.A.; Bourgeois, M.; Kraemer, H.; Csernansky, J.G.; and Berger, P.A. Prevalence of tardive dyskinesia in 3140 French inpatients. *Journal of Nervous and Mental Disease*, 170:111-112, 1982.

Yesavage, J.A.; Tanke, E.D.; and Sheikh, J.I. Tardive dyskinesia and steady state serum levels of thiothixene. *Archives of General Psychiatry*, 44:913-915, 1987.

Youssef, H.A., and Waddington, J.L. Involuntary orofacial movements in hospitalized patients with mental handicaps or epilepsy: Relationship to developmental/intellectual deficit

and presence or absence of long-term exposure to neuroleptics. *Journal of Neurology, Neurosurgery and Psychiatry*, 51:863-865, 1988.

## Acknowledgments

This research was supported in part by USPHS grants MH-45131 and MH-43693 from the National Institute of Mental Health and by the Department of Veterans Affairs. The authors thank George Schwartz, M.Sc., Lou-Ann McAdams, Ph.D., and Lilian Yassa for statistical analysis; and Nicole Daoust, Brenda Clemons, and Susan Noblin for their help in the preparation of this manuscript.

## The Authors

Ramzy Yassa, M.D., is Professor of Psychiatry, McGill University, and Staff Psychiatrist, Douglas Hospital Centre, Quebec, Canada. Dilip V. Jeste, M.D., is Professor of Psychiatry and Neurosciences, University of California, San Diego, and Chief, Psychiatry Service, Veterans Affairs Medical Center, San Diego, CA.
